# Supplementary material for: Effect of NPAH Exposure on Lung Function of Children in Indoor Coal Combustion Environment
Source: Hindawi journal article supplement (doi:10.1155/2024/6192008), 2024-01-01
Supplement: f1 [file 6192008.f1.docx]

**Effect of NPAHs exposure on lung function of children in indoor coal combustion environment**

Beibei Wang1, He Huang1, Ning Qin1*, Wenjing Zhao1, Qin Wang2, Suzhen Cao1, Xing Chen1, Xiangyu Xu1, Xiaoli Duan1

1 School of Energy and Environmental Engineering, University of Science and Technology Beijing, Beijing 100083, China

2 China CDC Key Laboratory of Environment and Population Health, National Institute of Environmental Health, Chinese Center for Disease Control and Prevention

* Corresponding author:

Ning Qin: E-mail: 00413038@163.com

Number SI pages: 8

Number the tables: 3

Number the figures: 4

Number the paragraphs of text: 2

**This supporting information provides tables and figures addressing**

Table S1: Basic information about participants

Table S2 Retention time of NPAHs

Table S3 Retention time of PAHs

Figure S1. Research area in Xinzhou City, Shanxi Province

Figure S2. Chromatograms of NPAHs by GC-MS

Figure S3. Chromatograms of PAHs by GC-MS

Figure S4: Parameter sensitivity for NPAHs inhalation incremental lifetime cancer risk assessment relating to Children in indoor coal combustion environment

Text S1: Pretreatment and instrumental analysis

Text S2: Principal component analysis

**Table S1: Basic information about participants**

|  | No. | Height (cm) | Weight (kg) | Gender | Age (year) |
| --- | --- | --- | --- | --- | --- |
| Heating season | 1 | 142.0 | 30.5 | Female | 11 |
| 2 | 151.5 | 39.8 | Male | 11 |
| 3 | 132.3 | 32.0 | Male | 10 |
| 4 | 135.0 | 31.5 | Female | 11 |
| 5 | 148.1 | 40.0 | Female | 11 |
| 6 | 128.2 | 29.1 | Female | 8 |
| 7 | 142.5 | 34.6 | Male | 11 |
| 8 | 117.3 | 19.4 | Female | 8 |
| 9 | 137.4 | 30.0 | Female | 9 |
| 10 | 132.2 | 26.0 | Male | 9 |
| 11 | 130.0 | 23.5 | Female | 9 |
| 12 | 134.4 | 27.1 | Female | 9 |
| 13 | 148.5 | 34.0 | Male | 11 |
| 14 | 130.2 | 25.0 | Male | 11 |
| 15 | 132.0 | 25.4 | Female | 9 |
| 16 | 134.1 | 30.5 | Male | 9 |
|  | 17 | 146.0 | 35.0 | Male | 11 |
|  | 18 | 153.8 | 38.0 | Female | 13 |
| Non-heating season | 1 | 133.0 | 34.0 | Male | 10 |
| 2 | 136.5 | 33.0 | Male | 9 |
| 3 | 143.5 | 42.0 | Female | 11 |
| 4 | 141.0 | 39.0 | Male | 12 |
| 5 | 130.5 | 26.5 | Male | 9 |
| 6 | 144.5 | 34.0 | Male | 11 |
| 7 | 139.0 | 32.0 | Male | 11 |
| 8 | 139.0 | 32.0 | Male | 12 |
| 9 | 119.0 | 20.0 | Female | 8 |
| 10 | 164.0 | 71.0 | Male | 13 |
| 11 | 140.5 | 31.0 | Female | 11 |
| 12 | 130.0 | 31.0 | Female | 8 |
| 13 | 138.0 | 48.0 | Male | 11 |
| 14 | 156.0 | 42.0 | Male | 15 |
| 15 | 126.5 | 26.0 | Female | 9 |
| 16 | 145.0 | 45.5 | Female | 11 |
| 17 | 136.0 | 33.5 | Female | 11 |
| 18 | 140.5 | 36.5 | Male | 11 |
| 19 | 143.0 | 35.5 | Male | 11 |
| 20 | 124.0 | 25.0 | Female | 9 |
| 21 | 154.0 | 41.0 | Female | 13 |
| 22 | 132.0 | 27.0 | Female | 9 |

**Table S2 Retention time of NPAHs**

| NO. | Name | RT(min) |
| --- | --- | --- |
| 1 | 1N-NAP | 7.625 |
| 2 | 2N-NAP | 8.215 |
| 3 | 5N-ACE | 10.898 |
| 4 | 2N-FLO | 11.451 |
| 5 | 9N-ANT | 11.592 |
| 6 | 9N-PHE | 12.085 |
| 7 | 3N-PHE | 12.43 |
| 8 | 2+3N-FLA | 15.706 |
| 9 | 7N-BAA | 19.076 |
| 10 | 6N-CHR | 19.975 |
| 11 | 6N-BAP | 22.466 |

**Table S3 Retention time of PAHs**

| NO. | Name | RT(min) |
| --- | --- | --- |
| 1 | ANY | 9.75 |
| 2 | ACE | 10.39 |
| 3 | FLO | 12.26 |
| 4 | PHE | 16.17 |
| 5 | ANT | 16.36 |
| 6 | FLO | 21.55 |
| 7 | BaA | 28.17 |
| 8 | CHR | 28.34 |
| 9 | BbF | 32.9 |
| 10 | BkF | 33 |
| 11 | BAP | 34.15 |
| 12 | IcdP | 38.31 |
| 13 | DahA | 38.49 |
| 14 | BghiP | 39.15 |


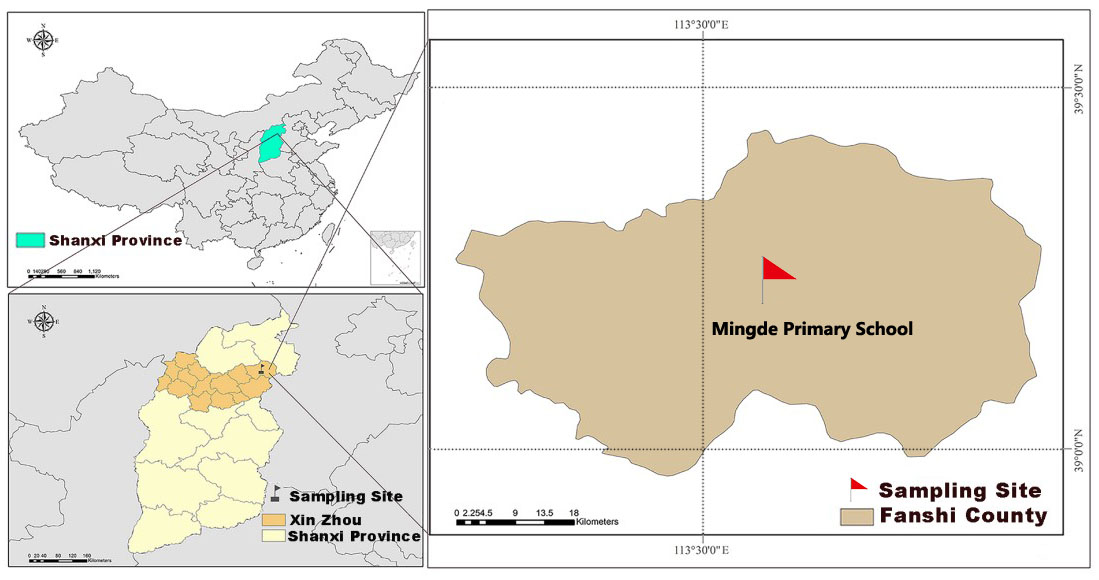


**Figure S1. Research area in Xinzhou City, Shanxi Province**


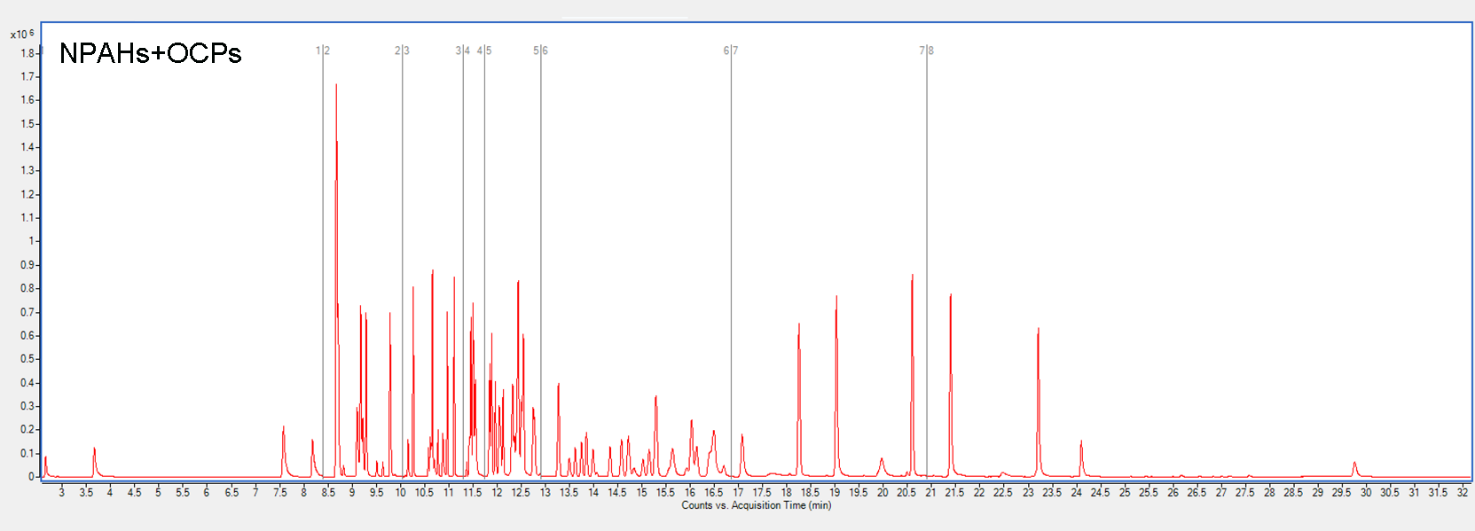


**Figure S2. Chromatograms of NPAHs by GC-MS**


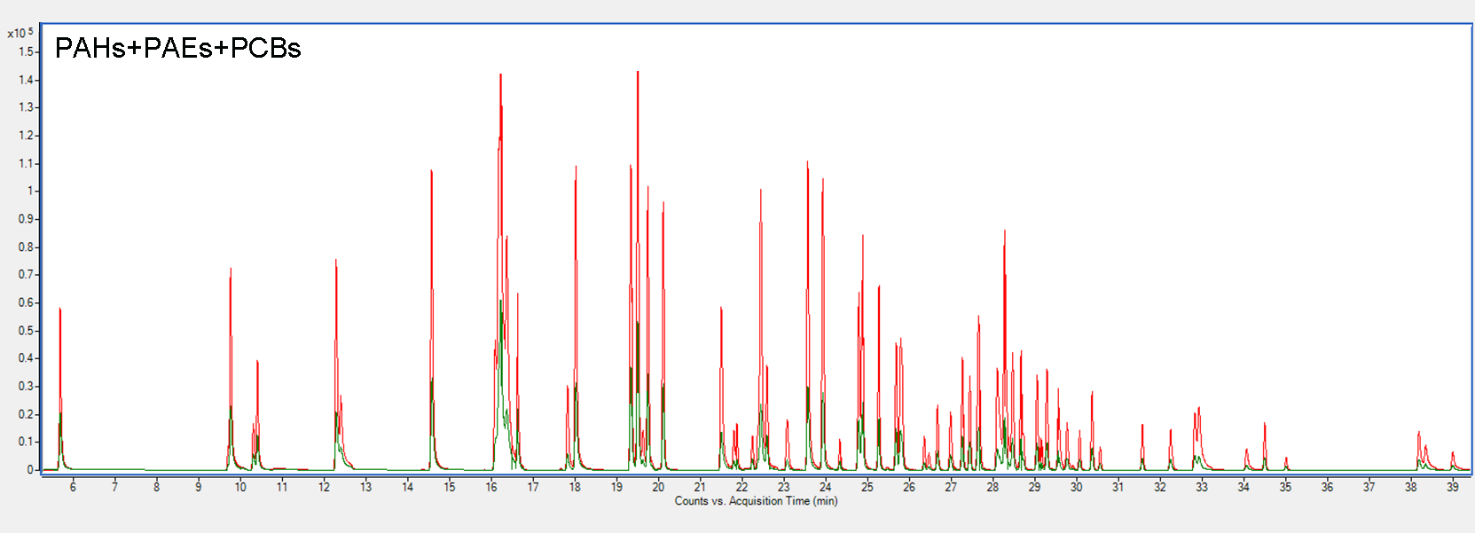


**Figure S3. Chromatograms of PAHs by GC-MS**


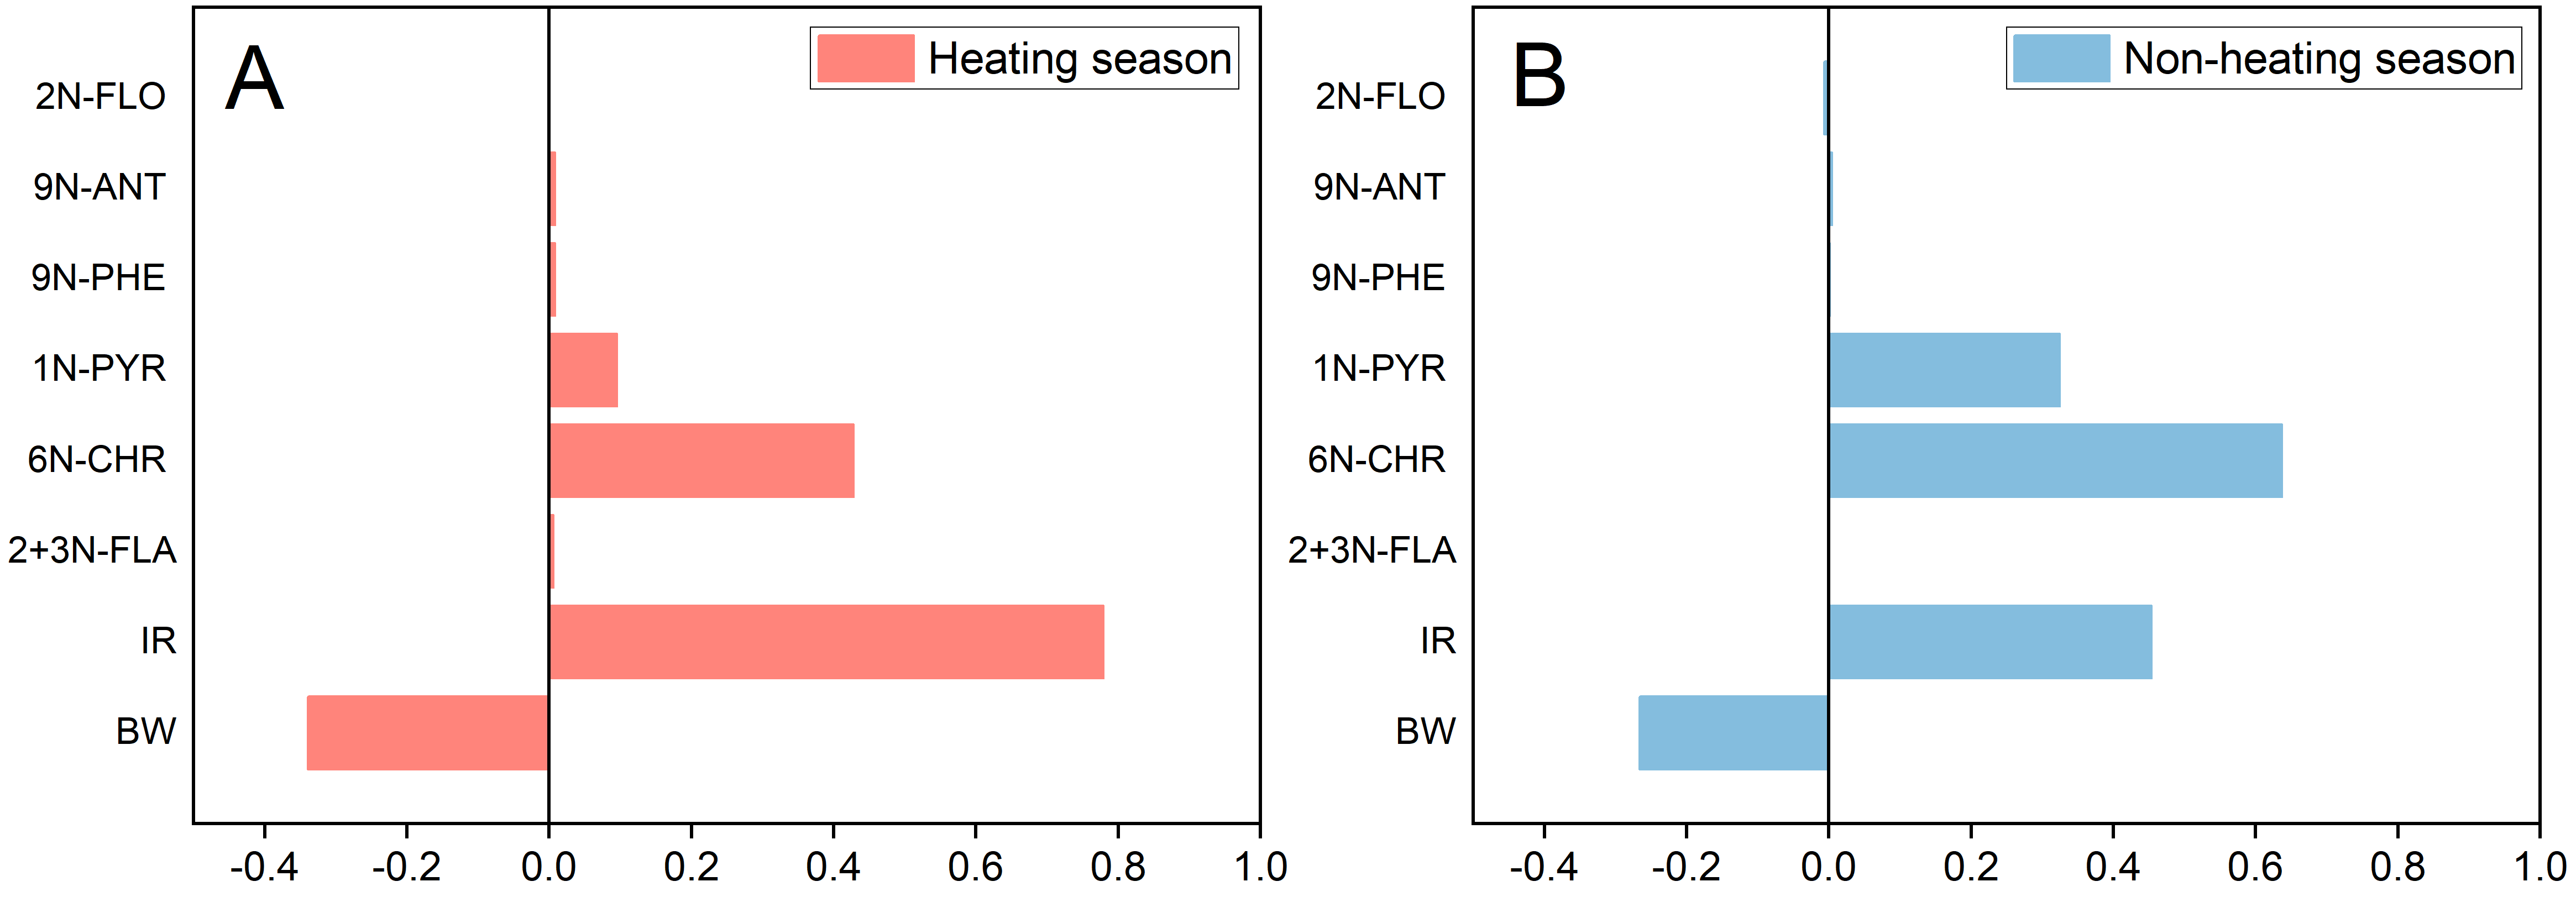


**Figure S4:** **Parameter sensitivity for NPAHs inhalation incremental lifetime cancer risk assessment relating to Children in indoor coal combustion environment**

**Text S1:** **Pretreatment and instrumental analysis**

The filter samples were extracted with 10 mL n-hexane/acetone mixture (1:1, v/v) using a microwave accelerated extraction system (CEM, Mars Xpress,USA). The temperature program in extraction: increase to 100 °C in 15 min and then held for another 20 min. The extracts were concentrated to about 1 mL using a rotary evaporator (N-1100; EYELA, Bunkyo-ku Tokyo, Japan), and then transferred to a Silica/alumina gel column for purification. The column was conditioned with 20 mL hexane (discarded) and then eluted with 18 mL hexane/dichloromethane mixture (1:1, v/v). The elute was finally concentrated to about 1 mL, changed to hexane solution, and then added with 20 ng deuterated standards 9-nitroanthracene-d9, 3-nitrofluoranthene-d9 and 6-nitrochrysene-d11.

A gas chromatograph coupled with a mass spectrometer (GC-MS, Agilent GC 7890B, MSD 977A, USA) was used for NPAHs analysis, and the capillary column is a 30 m HP-5MS capillary column. Helium was used as the carrier gas. The oven temperature was first held at 60°C for 1 min, gradually heated to 150°C at the rate of 15°C·min-1, held for 5 min and then to 300°C at a slower rate of 5°C·min-1, held for 20 min. The NPAHs targeted in this study include 1-Nitronaphthalene (1N-NAP), 2-Nitronaphthalene (2N-NAP), 5-Nitoacenaphthene (5N-ACE), 2-Nitrofluorene (2N-FLO), 6-Nitrochrysene (6N-CHR), 9-Nitroanthracene (9N-ANT), 2+3-Nitrofluoranthene (2+3N-FLA), 9-Nitrophenanthrene (9N-PHE), 3-Nitrophenanthrene (3N-PHE), 1-Nitropyrene, 7-Nitrobenzo[a] anthracene (7N-BaA), 6-Nitobenzo[a]pyrene (6N-BaP). The spiked sample recovery tests indicated that recoveries of NPAHs were between 67.6% (6N-BaP) to 89.4% (1N-PYR).

**Text S2: Principal component analysis**

PCA was widely employed in the receptor models construction to identify the major sources of aerosol emissions and to select statistically independent source tracers (Harrison et al., 1996). The basic assumption for receptor models is that the concentration of a pollutant at the receptor (Xi) for a given sample is the linear sum of the products of the emission profile (ai) and contribution (Si) of n-sources (Kavouras et al., 2001),

(1)

Before a PCA analysis, the concentration matrix is standardized using the Z-score as follows to minimize the differences between samples in terms of absolute NPAH concentrations.

(2)

where Xi is the concentration of the i-NPAHs, and Xi and σi are the mean and standard deviation of the i-NPAHs, respectively. After the normalization of the concentration matrix, PCA with varimax rotation was performed on NPAHs concentration from individual exposure data during heating and non-heating season using the software IBM SPSS 21, respectively. Only the principal components with eigenvalues > 0.1 were retained.

**References**

Harrison, R.M., Smith, D.J.T., Luhana, L., 1996. Source apportionment of atmospheric polycyclic aromatic hydrocarbons collected from an urban location in Birmingham, UK. Environmental Science & Technology 30, 825-832.

Kavouras, I.G., Koutrakis, P., Tsapakis, M., Lagoudaki, E., Stephanou, E.G., Von Baer, D., Oyola, P., 2001. Source apportionment of urban particulate aliphatic and polynuclear aromatic hydrocarbons (PAHs) using multivariate methods. Environmental Science & Technology 35, 2288-2294.
